# Supplementary figures and images for: Methylation at the C-2 position of hopanoids increases rigidity in native bacterial membranes
Source: eLife journal article supplement (doi:10.7554/elife.05663), 2015-01-15

A

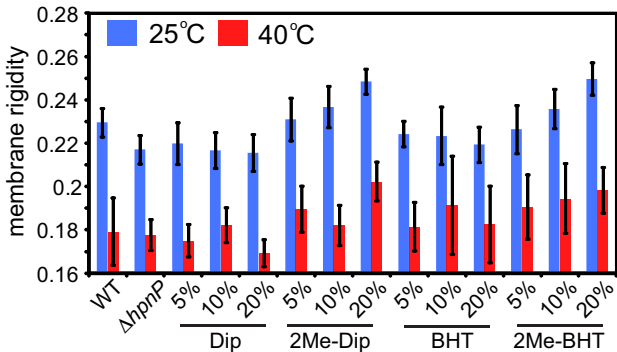

B

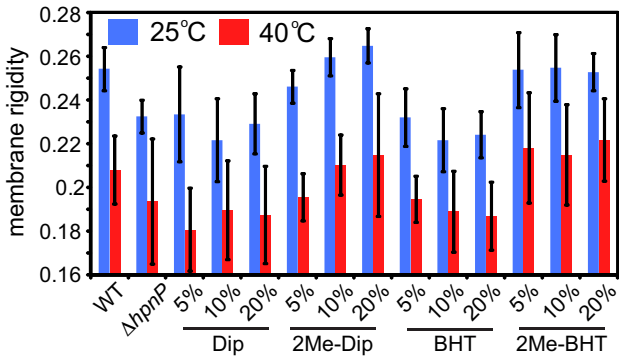

Supplement: supp [file elife-05663-supp-v1.zip]

A

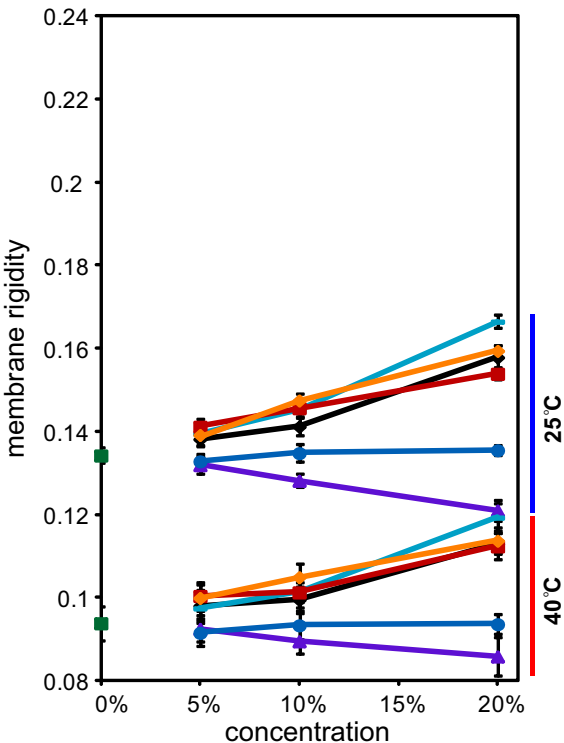

B

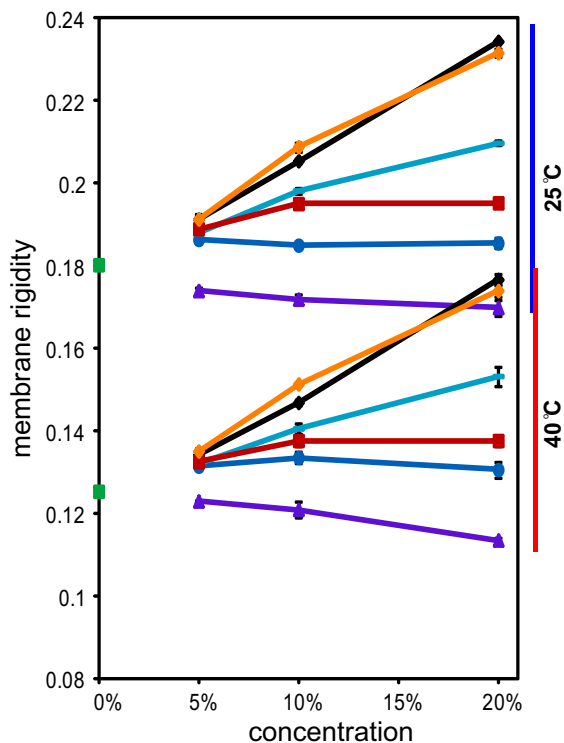

Supplement: supp [file elife-05663-supp-v1.zip]
